1 **Title: Microhabitat predicts species differences in exploratory behavior in Lake Malawi**  
2 **cichlids**

3  
4 Zachary V. Johnson†<sup>1</sup>, Emily C. Moore†<sup>2,3</sup>, Ryan Y. Wong<sup>4</sup>, John R. Godwin<sup>2</sup>, Jeffrey T.  
5 Streelman<sup>1</sup>, Reade B. Roberts<sup>2</sup>

6  
7 <sup>1</sup>School of Biological Sciences, Georgia Institute of Technology, Atlanta, GA, USA

8 <sup>2</sup> Department of Biological Sciences and W. M. Keck Center for Behavioral Biology, North  
9 Carolina State University, Raleigh, NC, USA

10 <sup>3</sup> Division of Biological Sciences, University of Montana, Missoula, MT, USA

11 <sup>4</sup> Department of Biology and Department of Psychology, University of Nebraska Omaha,  
12 Omaha, NE, USA

13  
14 † Both authors contributed equally to this work

15  
16 Acknowledgements: Preparation of this manuscript was supported by an Arnold and Mabel  
17 Beckman Foundation Beckman Young Investigator Award to RBR and by NIH grant  
18 R01GM101095 to JTS

19  
20 Declarations of interest: none

21  
22  
23 Address Correspondence to:

24  
25 Zachary Johnson

26 E-mail: [zachary.johnson@biosci.gatech.edu](mailto:zachary.johnson@biosci.gatech.edu)

27 Postal: 950 Atlantic Dr NW

28 Engineered Biosystems Building, 3<sup>rd</sup> floor

29 Atlanta, GA 30332

30  
31 Emily Moore

32 E-mail: [emily.moore@umontana.edu](mailto:emily.moore@umontana.edu)

33 Postal: 32 Campus Drive

34 Division of Biological Sciences, HS 104

35 Missoula, MT, 59812

36

37

38

39

40

41

42 **Abstract**

43

44 Encountering and adaptively responding to unfamiliar or novel stimuli is a fundamental  
45 challenge facing animals and is linked to fitness. Behavioral responses to novel stimuli, or  
46 exploratory behavior, can differ strongly between closely related species; however, the  
47 ecological and evolutionary factors underlying these differences are not well understood, in  
48 part because most comparative investigations have focused on only two species. In this study,  
49 we investigate exploratory behavior across 23 species in a previously untested vertebrate  
50 system, Lake Malawi cichlid fishes, which comprises hundreds of phenotypically diverse  
51 species that have diverged in the past one million years. We investigate behavioral variation  
52 across species, across microhabitats, and across environmental contexts. We find strong  
53 species differences in behavior that are associated with microhabitat, demonstrate that  
54 intermediate microhabitats are associated with higher levels of exploratory behavior, show  
55 that patterns of behavioral covariation across contexts are characteristic of modular complex  
56 traits, and contrast Malawi cichlid data with behavioral data from selectively bred high- and  
57 low-exploratory zebrafish. Taken together, our results tie ecology to species differences in  
58 behavior, and highlight Lake Malawi cichlids as a powerful system for understanding the  
59 evolution, ecology, and biology of natural behavioral variation.

60

61 **Keywords:** teleosts, neophobia, neophilia, anxiety-like behavior, bold shy axis, stress  
62 response, habitat preference, behavioral syndromes, behavioral modularity, behavioral  
63 integration

64 **Highlights**

65

- 66 • Malawi cichlids exhibit high phenotypic variance in exploratory behaviors
- 67 • Species differences in exploratory behavior are explained by microhabitat
- 68 • Rock-dwelling species exhibit strong edge preferences across assays
- 69 • Intermediate habitats are associated with “high exploratory” open field behavior
- 70 • Patterns of behavioral covariance across contexts are modular in Malawi cichlids

71

72

73

74

75

76

77

78

79

80

81

82

83

84

85

86

87

88

89

90

91

92

93

94 **1. Introduction**

95

96 Deciding how to respond to unfamiliar or novel stimuli is a fundamental aspect of animal life  
97 that has important implications for fitness. For example, how individuals respond to novel  
98 conspecifics, heterospecifics, physical environments, food resources, or objects can directly  
99 impact survival (N. J. Dingemanse, Both, Drent, & Tinbergen, 2004; Ferrari, McCormick,  
100 Meekan, & Chivers, 2015; Lapiedra, Schoener, Leal, Losos, & Kolbe, 2018; Smith &  
101 Blumstein, 2008). Behavioral responses to novel stimuli can vary strongly between individuals,  
102 populations, and closely-related species; however, the factors underlying this behavioral  
103 variation are not well resolved.

104

105 At the interspecies level, large scale comparative studies are a promising strategy for  
106 identifying evolutionary and ecological factors contributing to variation in behavioral responses  
107 to novel stimuli (Niels J. Dingemanse et al., 2007). For example, a comparative study across  
108 61 species of parrots showed that species differences in microhabitat predict species  
109 differences in behavioral responses to novel objects: species inhabiting intermediate habitats  
110 between the forest and the savannah more readily approached novel objects compared to  
111 species inhabiting more uniform savannah habitats (R. Greenberg, 2003; Greenberg &  
112 Mettke-hofmann, 2001; Claudia Mettke-Hofmann, Winkler, & Leisler, 2002). These and other  
113 findings support hypotheses that ecological plasticity or habitat variability is associated with  
114 higher levels of exploratory behavior. However, it is unclear how well this model generalizes  
115 across species and vertebrate lineages, in part because many comparative studies of  
116 behavioral responses to novel stimuli have compared just two species and have been  
117 conducted in birds (Garland & Adolph, 1994; Réale, Reader, Sol, McDougall, & Dingemanse,  
118 2007). Furthermore, different behavioral assays and testing parameters have been used  
119 across studies, making it difficult to identify organizing principles that explain species  
120 differences in behavior. To better elucidate relationships between ecological factors, such as  
121 microhabitat, and species differences in exploratory behavior, larger comparative studies  
122 employing multiple assays and in new vertebrate systems are needed.

123

124 Lake Malawi cichlid fishes are well-suited for comparative investigations of phenotypic  
125 variation (R. C. Albertson, Markert, Danley, & Kocher, 1999; Johnson & Young, 2018; Rupp &  
126 Hulseley, 2014; Ryan A. York & Fernald, 2017). These fishes have recently (within the past one  
127 million years) undergone explosive speciation, radiating into an estimated 500-1000 species  
128 that vary in morphology, coloration, diet, habitat preference, and behavior (Brawand et al.,  
129 2014; Kocher, 2004). Additionally, within Lake Malawi, ecological conditions vary across small  
130 spatial scales, resulting in diverse species occupying different microhabitats while living in  
131 close geographic proximity. For example, while many species can be grouped into two  
132 canonical ecotypes, rock-dwelling and sand-dwelling (Kocher, 2004), a large number of  
133 species inhabit intermediate habitats, including the interface between rocky and sandy  
134 substrate, and shallow sediment-rich bays near rocks and reed stands. Thus, the Lake Malawi  
135 species assemblage is well positioned to test relationships between microhabitat and species  
136 differences in behavior.

137

138 Comparative studies in Lake Malawi cichlids have already begun generating insights into the  
139 evolution of complex traits (Streelman & Danley, 2003; Sylvester et al., 2010; R. A. York et al.,  
140 2018). For example, ecological factors have been associated with species differences in  
141 aggression and bower-building behavior (Danley, 2011; Ryan A. York et al., 2015). Other  
142 studies have investigated the evolution of non-behavioral traits such as oral jaw morphology  
143 and color patterning, and have demonstrated modular patterns of phenotypic variation (R.  
144 Craig Albertson et al., 2014; Parsons, Cooper, & Albertson, 2011). Briefly, evolutionary  
145 modularity and integration refer to patterns of covariation among sets of traits (e.g. dimensions  
146 of different oral jaw bones), and they are thought to be related to trait evolvability (Raff & Raff,  
147 2000; Wagner, Pavlicev, & Cheverud, 2007). Phenotypic integration refers to more uniform  
148 patterns of covariation, while modularity refers to non-uniform patterns of covariation and may  
149 reflect increased trait evolvability, although these relationships are complex (Armbruster,  
150 Pélabon, Bolstad, & Hansen, 2014).

151

152 Although Lake Malawi cichlids are primely positioned to link ecological and evolutionary  
153 factors to species differences in behavior, only a small number of comparative behavioral

154 investigations have been conducted in this species group. We aim to address this gap by  
155 investigating species differences in exploratory behavior using four established behavioral  
156 assays (Stewart et al., 2011; Stewart et al., 2012) across a total of 23 species, which  
157 collectively span five Lake Malawi microhabitats: rock, sand, rocky intermediate, sandy  
158 intermediate, and shallow silt. We test the following hypotheses: (i) species differ in behavioral  
159 responses to novel stimuli; (ii) intermediate microhabitats are associated with higher levels of  
160 exploratory behavior; and (iii) patterns of behavioral variation across Lake Malawi cichlids are  
161 modular. We also contrast behavioral variance and covariance among Lake Malawi cichlids  
162 to previously published behavioral data in high and low exploratory strains of zebrafish to  
163 highlight patterns of behavioral diversity in this species assemblage.

164

## 165 **2. Methods**

166

### 167 **2.1 Subjects**

168

169 Subjects were maintained at two institutions, Georgia Institute of Technology (GT) in Atlanta,  
170 GA and North Carolina State University (NCSU) in Raleigh, NC. The open field test was  
171 conducted with animals from both facilities; the novel tank test and light-dark test were  
172 conducted with GT animals only; and the novel object test was conducted with NCSU animals  
173 only. Both institutions house laboratory cichlid lines derived from wild-caught animals collected  
174 in Lake Malawi. Behavioral data from two separate studies were re-analyzed for Modularity  
175 Modular Clustering analysis (described below): one in which 70 subjects from five species  
176 were tested in the novel object test, open field test, and resident intruder test at NCSU; and a  
177 second previously published behavioral study in zebrafish (Ryan Y. Wong et al., 2012).

178

179 GT animals were maintained in the Engineered Biosystems Building cichlid aquaculture  
180 facilities at GT in accordance with the Institutional Animal Care and Use Committee (IACUC)  
181 guidelines. Age- and size-matched male and female individuals were socially housed on a  
182 12:12-hour light:dark cycle with full lights on between 8am-6pm Eastern Standard Time (EST)  
183 and dim lights on for 60 minutes between the light-dark transition (7am-8am and 6pm-7pm

184 EST). All fish were housed at densities of approximately 0.67 cm of fish/liter in 190-liter or 95-  
185 liter glass tanks measuring 92 cm (wide) x 46 cm (deep) x 42 cm (high) or 46 cm (wide) x 46  
186 cm (deep) x 42 cm (high), respectively. Male and female subadults (age 90-180 days) were  
187 analyzed in the novel tank test and light-dark test (described below), and male and female  
188 reproductive adults (>180 days) were tested in the open field test (described below).

189

190 NCSU animals were maintained in the NCSU Roberts Lab aquaculture facility in Raleigh, NC,  
191 under a 12:12-hour light:dark cycle with dim lights on for 15 minutes during the light-dark  
192 transition periods. All experiments were conducted under the approval of the Institutional  
193 Animal Care and Use Committee (IACUC) guidelines (protocol number 14-138-O). For the  
194 five NCSU species included in the novel object and behavioral module analysis, age matched  
195 male and female individuals from at least two families per species were raised in mixed-  
196 species groups in a 473-liter (184 cm x 47 cm x 60 cm) aquarium until onset of reproductive  
197 age, when behavioral assays began. For all thirteen NCSU species tested for open field  
198 behavior, fish were housed in size-matched general husbandry tanks and co-cultured as  
199 necessary to reduce aggression.

200

## 201 2.2 Behavioral assays

202

203 A total of 520 subjects spanning 23 Lake Malawi cichlid species were tested in one or more  
204 exploratory behavioral assay(s), described in detail by institution (GT and NCSU) below. 110  
205 subjects from eight species were tested at GT in the novel tank test, and 77 of these subjects  
206 were also tested in the light-dark test (see Supplementary Tables 1 and 2 for sample sizes by  
207 species). 340 subjects from a total of 19 species were tested in the open field test: 227 subjects  
208 from 13 species were tested at NCSU and 113 subjects from seven species were tested at  
209 GT, with one species (*Labeotropheus fuelleborni*) tested at both institutions (See  
210 Supplementary Table 3 for sample sizes by species). Pilot data indicated strong effects of  
211 species but no effects of sex on exploratory behavior across multiple assays. Based on these  
212 data, subjects for the present study were sampled randomly from mixed sex tanks but were  
213 not euthanized and dissected to determine gonadal sex, with the exception that visually

214 identified dominant males were sampled at a proportion consistent with the composition of the  
215 home tank, and maternal mouthbrooding females were not sampled. All assays were  
216 performed between 10:00 and 16:00 Eastern Standard Time EST.

217

#### 218 *Novel tank test*

219

220 The novel tank test is designed to measure exploratory behavior in a narrow, tall tank with  
221 transparent sides (Fig 1A,B). Individual subadult subjects (90-180 days; 4-6.5 cm length)  
222 spanning eight species were each collected between 11:00-15:00 Eastern Standard Time  
223 from their home tank, transferred to a 300 mL beaker of water, and habituated for 30 minutes  
224 prior to behavioral testing. Water for both habituation beakers and test tanks was collected  
225 from a circulating system supplying all home tanks, ensuring that water was consistent across  
226 the home tank, transfer, habituation, and testing environments. Following habituation, subjects  
227 were introduced to a plastic 1.8-L novel tank (Aquaneering; 29.7 cm long x 7.5 cm wide 15.2  
228 cm high) and were side-view video recorded for 6 minutes using a GoPro Hero4 camera.  
229 Species composition was counterbalanced across trials to control for potential effects of  
230 testing round. EthoVision (Noldus) software was used to analyze distance traveled, latency to  
231 enter top half, total duration spent in top half, and average distance from the corners.

232

#### 233 *Light-dark test*

234

235 In the light-dark test, subjects can freely move between an opaque black chamber and a  
236 backlit semi-opaque white chamber (Fig 1C,D). This test is thus designed to investigate  
237 exploratory behavior between environments that vary in light intensity. Individual subadult  
238 subjects (90-180 days; 4-6.5 cm length) from all eight tested species were transferred to a 300  
239 mL beaker of water and habituated for 60 minutes prior to testing. All water was collected from  
240 the same circulating system (described above). Following habituation, subjects were first  
241 introduced to a 6.5 cm x 7.5 cm habituation chamber (half white, half black) within a larger  
242 custom built acrylic "light-dark" tank (half white, half black; 24 cm long x 6.5 cm wide x 16.5  
243 cm high). Individual subjects habituated for 5 minutes in the central habituation chamber, after



244 which both inserts were immediately and simultaneously removed, allowing subjects to swim  
245 freely throughout the entirety of the light-dark tank. Species were counterbalanced across  
246 trials. All subjects were top-down video recorded for 6 minutes using a GoPro Hero4 camera.  
247 EthoVision (Noldus) software was used to analyze distance traveled in the light half (total  
248 distance traveled in the dark half could not be calculated because automated tracking from  
249 RGB video is not possible when the subject is in this region of the tank), latency to enter the  
250 light half, number of entries into the light half, and total duration in the light half.

251

### 252 *Novel object test*

253

254 The novel object test is designed to test an animal's behavioral response (i.e. approach,  
255 avoidance, and exploration) toward an unfamiliar object. Subjects were introduced to a 38-  
256 liter (50 cm x 28 cm x 33 cm) aquarium with a single flowerpot territory for three days of  
257 acclimation. To assess activity and motivation during the acclimation period, latency to feed  
258 was measured at each meal. All subjects ate within 1 minute of feeding by the final day of  
259 acclimation. Once acclimated, a camera was placed overhead and water and air flow was  
260 turned off for five minutes before commencement of the novel object test. A snail shell from  
261 Lake Malawi was then introduced into the home aquarium and behavior was recorded for 30  
262 minutes with a digital video camera (Fig 1G,H). The position of the most rostral aspect of the  
263 head was scored with Manual Tracking plug-in (Cordelieres 2005) for ImageJ (Schneider et  
264 al. 2012) in 0.2 second intervals (5 frames per second). Aquarium positioning prevented the  
265 entire arena from being filmed, so position analysis was restricted to the front-most 25.4 cm x  
266 26 cm of the tank for all subjects. For the novel object test, total time spent stationary,  
267 approaching, and retreating from the object; as well as approach velocity, retreat velocity,  
268 average velocity, and change in velocity over the course of the assay were analyzed.

269

### 270 *Open field test*

271

272 The open field test for fish is generally similar in design to the open field test used in mice and  
273 other rodents, in which subjects are allowed to move freely throughout a large open arena. In

274 fishes, the open field test is thus used to investigate behavioral responses to an unfamiliar  
275 large and open shallow water environment (Fig 1E,F). 19 species were analyzed at two sites  
276 and using two arena sizes. Fish were gently netted from their home tank and placed in the  
277 center of a white, opaque container filled with aquaculture system water at shallow depths to  
278 restrict vertical movement as much as possible. Tank water was replaced between every  
279 individual. For the five NCSU species measured for multiple assays, a rectangular 76 cm x 46  
280 cm arena was filled with 6 cm of water; for all GT fish and all additional NCSU fish, the size of  
281 the arena was scaled to the size of the fish. In these experiments, the large 49.6 cm square  
282 arena was filled to a depth of 15 cm of water for fish > 4.5 cm SL and the medium 25.5 cm  
283 square arena was filled to a depth of 10 cm of water for fish 2.5-4.5 cm SL. Video recordings  
284 were taken for 5.5 minutes from an overhead position. The first 10 seconds of the video files  
285 were trimmed (Quicktime Player 7) to remove footage of fish placement, and processed at 10  
286 frames per second (fps) using C-trax (0.5.4, (Branson et al. 2009)) to generate XY coordinates  
287 of fish position in arena. Custom scripts were used to generate position and speed in the arena  
288 (R v3.3.1). For place analysis, the arena was divided into a grid of 16 squares, with the outer  
289 ring of squares forming the “peripheral” regions, the central four squares forming the “center”  
290 region, and the four corner squares forming the “corner” regions.

291

## 292 2.3 Statistics

293

294 All statistics analyses were performed in R (R v3.3.1 and R v3.4) unless otherwise specified.

295

### 296 *Place bias in novel environment assays*

297

298 To measure general place bias for specific arena zones in the novel tank and light-dark tests  
299 across species, a linear regression model with time spent in zone as the outcome variable,  
300 and zone and species as categorical predictor variables, was fit to the data.

301

302

***Time spent in zone ~ zone + species***

303

304 Because the open field test was performed at two test sites using two arena sizes, these  
305 were added to the model as categorical variables to analyze place bias for central versus  
306 peripheral regions in the open field test:

307

308 *Time spent in zone ~ zone + species + test site + arena size*

309

310 Within species, paired t-tests were used to test the significance of differences in time spent  
311 between zones.

312

313 *Effect of species on behavioral responses to novel stimuli*

314

315 When appropriate, one-way ANOVA was used to test for species differences in behaviors for  
316 the assays where only a subset of all species was tested. For some of the measurements  
317 taken, there were unequal variances between species. Because unequal variance between  
318 groups violates the assumptions of one-way ANOVA, non-parametric tests were used in these  
319 cases, including the one-way ANOVA equivalent Wilcoxon/Kruskal-Wallis test and the  
320 Wilcoxon Product-Limit survival fit for latency measures. To be considered to have unequal  
321 variances, at least one of O'Brien, Brown-Forsythe, or Levene's tests of unequal variance had  
322 to be significant at the  $p=0.05$  level. Pairwise contrasts were performed with Tukey-Kramer  
323 honest significant difference test (HSD) for measurements with equal variance between  
324 groups, and Wilcoxon multiple comparisons was conducted for those requiring non-parametric  
325 analysis. To examine behavioral responses to a novel object over time, we used a MANOVA  
326 repeated measures, where time points within individuals were analyzed at one level, and  
327 differences between species were analyzed as an additional level, with a species\*time  
328 interaction term. Since Mauchly's Test of Sphericity indicated violations to the sphericity  
329 assumption (criterion=0.346;  $\text{Chi}^2=67.95$ ;  $\text{df}=14$ ,  $p=4.53 \times 10^{-9}$ ) we used the Huynh-Feldt  
330 correction to adjust for unequal covariances between groups.

331

332 *Effect of microhabitat on behavioral responses to novel stimuli*

333

334 The association between microhabitat and behavior was assessed through multiple linear  
335 regression using the “lm” package in R. The behavior of interest was the outcome variable  
336 and microhabitat, lineage (Mbuna vs. non-Mbuna), genus, species, arena size, and test site  
337 were predictor variables. This allowed behavioral variation explained by microhabitat to be  
338 measured while simultaneously controlling for variance explained by phylogenetic relatedness  
339 and batch-like effects. The model was organized as follows:

340

341 ***Open field behavior ~ microhabitat + lineage + genus + species + test site + arena size***

342

343 This model was used to test several core open field behavioral metrics, including distance  
344 traveled, time spent in the corners, time spent in the center region, and total number of entries  
345 into the center region. To assess the relationship between intermediate habitats and species  
346 differences in behavior, a categorical predictor variable representing intermediate vs. non-  
347 intermediate was added to the model:

348

349 ***Open field behavior ~ intermediate + microhabitat + lineage + genus + species + test site + arena size***

350

351 To assess the relationship between microhabitat and time spent in the corner regions in the  
352 novel tank test, a similar linear model was used except (i) genus was excluded as all species  
353 in this test were members of a unique genus, and (ii) test site and arena size were excluded  
354 as all animals were tested at the same site using identical tanks. Thus, this model was  
355 organized as follows:

356

357 ***Novel tank behavior ~ microhabitat + lineage + species***

358

359 To examine changes in open field movement over time, we used a MANOVA repeated  
360 measures, where time points within individuals were analyzed at one level, and differences  
361 between microhabitat were analyzed as an additional level, with a microhabitat\*time  
362 interaction term, controlling for lab and arena size. Change in velocity (minute 1 velocity –  
363 minute 5 velocity) was analyzed with an ANOVA by microhabitat, where a positive value

364 indicates the subject swam faster at the start of the assay, and a negative value indicates the  
365 subject swam slower at the start of the assay.

366

### 367 *Behavioral modularity test*

368

369 To examine behavioral correlations within and across assays, we performed Modulated  
370 Modularity Clustering (MMC) analysis (Stone & Ayroles, 2009). This test identifies clusters of  
371 covariance in multivariate data. Although this method was developed to analyze gene  
372 expression data, it is effective for any large, multivariate datasets where many phenotypes  
373 have been measured across a large sample of subjects. We separately performed MMC on  
374 two independent Lake Malawi cichlid datasets: a GT data set to analyze behavioral modules  
375 between the novel tank test and light-dark test, and a NCSU dataset to analyze behavioral  
376 modules between the open field, novel object, and resident-intruder behavioral tests. We also  
377 applied this test to a previously published zebrafish behavioral dataset where individuals were  
378 measured across multiple assays and correlations of behaviors between assays were  
379 identified (Ryan Y. Wong et al., 2012). Each individual behavioral metric within each assay  
380 (such as speed, position, time spent in a specific zone, etc.) was included in the analysis.  
381 Since these assays are of different measurement types, Spearman rank-order correlation was  
382 used in place of Pearson's correlation.

383

## 384 **3. Results**

385

### 386 3.1 Malawi cichlids exhibit strong place biases across assays

387

388 In general, Lake Malawi cichlids exhibited strong place biases for specific arena zones across  
389 the three novel environment assays, spending more time in the bottom half of the novel tank  
390 test, the light half of the light-dark test, and the corner regions of the open field test. The  
391 direction of the place biases were the same in all species tested. More detailed results are  
392 organized by assay below:

393

394 *Malawi cichlids prefer corner regions in the open field test*

395

396 Malawi cichlids spent more time in the outer region of the open field test compared to the  
397 center region. Linear regression controlling for species, test site, and arena size showed a  
398 strong place bias between the central versus peripheral regions ( $n=340$ ;  $t=89.24$ ;  $p<0.0001$ );  
399 spending an average of  $298.9\pm 2.2$  seconds in the periphery compared to  $21.1\pm 2.2$  seconds  
400 in the center. Both *Aulonocara baenschi* and *Metriaclima mbenji* spent significantly less time  
401 in corner regions compared to multiple other species (Supplementary Figure 1C). Additional  
402 results are presented by species in Supplementary Table 3.

403

404 *Malawi cichlids prefer the bottom region in the novel tank test*

405

406 A linear model controlling for species revealed that Malawi cichlids generally expressed a  
407 strong place preference for the bottom half in the novel tank test ( $n=110$ ;  $t=20.982$ ;  $p<0.0001$ ),  
408 spending an average of  $307.5\pm 6.1$  seconds in the bottom half compared to  $52.5\pm 6.1$  seconds  
409 in the top half. The direction of the preference was consistent across all species tested, and  
410 two-tailed paired t-tests showed that this preference was significant within each species  
411 ( $p<0.05$  for all species tested, Supplementary Table 1). Notably, *post-hoc* Tukey's HSD tests  
412 showed significant differences in the strength of the preference between *Mchenga*  
413 *conophoros*, a sand-dwelling species, and all other species tested (Supplementary Figure 1A).  
414 Detailed results are presented by species in Supplementary Table 1.

415

416 *Malawi cichlids prefer the dark region in the light-dark test*

417

418 Malawi cichlids exhibited a strong place bias in the light-dark test ( $n=77$ ;  $t=16.07$ ;  $p<0.0001$ ),  
419 spending more time in the dark half (an average of  $283.2\pm 8.9$  seconds in the dark half versus  
420  $76.8\pm 8.9$  seconds in the light half). Detailed results are presented by species in Supplementary  
421 Table 1. Notably, one sand-dwelling species, *Copadichromis virginalis*, did not exhibit a  
422 significant place bias between the light and dark zones ( $n=12$ ; two-tailed paired t-test,  $p=0.46$ ;  
423 Supplementary Table 2), and this differed significantly from several other species

424 (Supplementary Figure 1B). Additional results are presented by species in Supplementary  
425 Table 2.

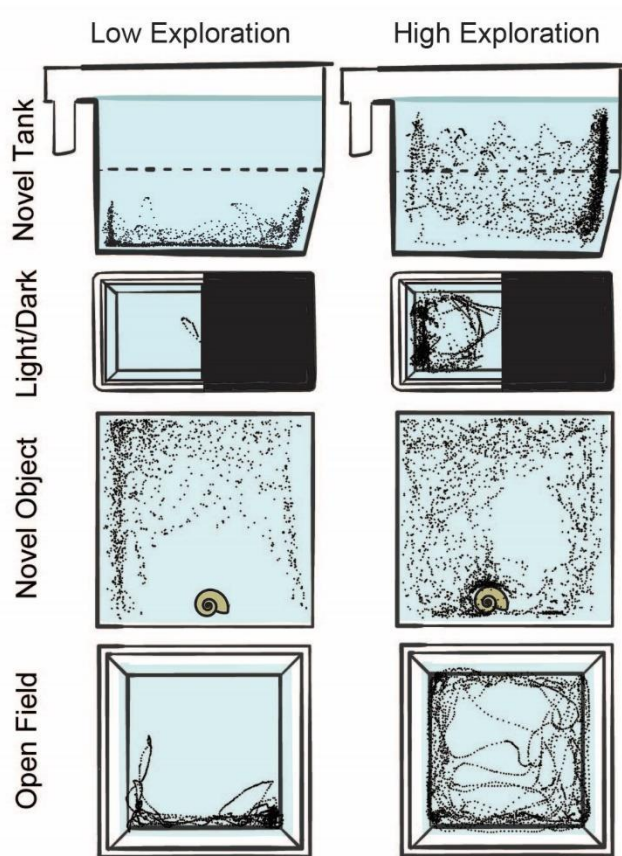

426

427 **Figure 1. Variation in exploratory behavior across assays in Lake Malawi cichlids.**

428 Representative traces of the four assays used in this study, with individual points illustrating  
429 the position of the fish in the arena at a single moment. Individual fish can show little  
430 exploration (left column), or high levels of exploration (right column). Schematics reflect the  
431 angles at which video cameras were positioned for recording behavior for each assay.

432

433 3.2 Malawi cichlids exhibit high phenotypic variance in exploratory behavior

434

435 Because the novel tank test parameters conducted in Lake Malawi cichlids were the same as  
436 those conducted in zebrafish, we measured phenotypic variance across Lake Malawi cichlid  
437 species and compared it to phenotypic variance across strains of zebrafish that have been  
438 selected for high and low exploratory behavior. For duration in the top, a primary measure of  
439 exploratory behavior in this assay, Malawi cichlids exhibited higher behavioral variance  
440 compared to zebrafish (n=110 Malawi cichlid individuals from eight species, n=99 zebrafish  
441 from three selection lines; variance for cichlids = 134.6 versus variance for zebrafish = 72.7;

442 F-test,  $p=0.006$ );. This was also true for latency to enter the top (variance for cichlids = 19,941  
443 versus variance for zebrafish = 10,653; F-test,  $p=0.004$ ), but not for frequency of entries into  
444 the top ( $p=0.996$ , variance for zebrafish = 15.56 vs. variance for cichlids = 15.59).

445

### 446 3.3 Malawi cichlids exhibit strong species differences in exploratory behavior

447

448 We next tested whether Lake Malawi cichlid species differed in more detailed dimensions of  
449 behavior within each assay. These results are organized by assay below:

450

#### 451 *Open field test*

452

453 In the open field test, total distance traveled, total number of entries into the center region,  
454 total time spent in the center region, and total time spent in the corners were analyzed.

455 Because this assay was conducted using two different square arena sizes at two different test  
456 locations, the data was analyzed using a one-way ANOVA including an error term with arena  
457 size nested within test site. These analyses revealed a significant effect of species on total  
458 distance traveled ( $F_{18,318}=6.01$ ;  $p=1.53 \times 10^{-12}$ ; Eta-squared=0.25), total number of entries into  
459 the center region ( $F_{18,318}=8.50$ ;  $p<2 \times 10^{-16}$ ; Eta-squared=0.32), total time spent in the center  
460 region ( $F_{18,318}=4.75$ ;  $p=2.28 \times 10^{-9}$ ; Eta-squared=0.21), and total time spent in the corners  
461 ( $F_{18,318}=8.83$ ;  $p<2 \times 10^{-16}$ ; Eta-squared=0.33) Fig 2A.

462

#### 463 *Novel tank test*

464

465 In the novel tank test, several aspects of exploratory behavior were analyzed: total distance  
466 traveled, latency to enter the top half, total number of entries into the top half, and total time  
467 spent in the top half. In addition to these metrics, we also analyzed the average distance from  
468 the tank bottom, and the average distance from the tank corners. One-way ANOVAs revealed  
469 strong effects of species on total distance traveled ( $F_{7,102}=8.30$ ;  $p=5.38 \times 10^{-8}$ ; Eta-  
470 squared=0.36), latency to enter the top half ( $F_{7,102}=5.44$ ;  $p=2.50 \times 10^{-5}$ ; Eta-squared=0.27), total  
471 number of entries into the top half ( $F_{7,102}=8.56$ ;  $p=3.21 \times 10^{-8}$ ; Eta-squared=0.37), total time



472 spent in the top half ( $F_{7,102}=8.64$ ;  $p=2.74 \times 10^{-8}$ ; Eta-squared=0.37, Fig 2B), average distance  
473 from the tank bottom ( $F_{7,102}=12.48$ ;  $p=1.86 \times 10^{-11}$ ; Eta-squared=0.46), and average distance  
474 from the tank corners ( $F_{7,102}=8.21$ ;  $p=6.49 \times 10^{-8}$ ; Eta-squared=0.36).

475

#### 476 *Light-dark test*

477

478 For the light-dark test, latency to enter the light half, total number of entries into the light half,  
479 total time spent in the light half, and total distance traveled in the light half were analyzed.  
480 One-way ANOVAs revealed a significant effect of species on total distance traveled in the light  
481 half ( $F_{7,63}=2.87$ ;  $p=0.012$ ; Eta-squared=0.24), latency to enter the light half ( $F_{7,63}=4.42$ ;  
482  $p=4.75 \times 10^{-4}$ ; Eta-squared=0.33), total number of entries into the light half ( $F_{7,63}=2.54$ ;  $p=0.023$ ;  
483 Eta-squared=0.22), and total time spent in the light half ( $F_{7,63}=4.95$ ;  $p=1.67 \times 10^{-4}$ ; Eta-  
484 squared=0.35, Fig 2C).

485

#### 486 *Novel object test*

487

488 In the novel object test there were strong species differences in time spent approaching  
489 the object (Wilcoxon/Kruskal-Wallis:  $\chi^2=14.04$ ,  $df=4$ ,  $p=0.0072$ ), swimming away from the  
490 object, (Wilcoxon/Kruskal-Wallis:  $\chi^2=15.06$ ,  $df=4$ ,  $p=0.0046$ ), and remaining stationary  
491 (Wilcoxon/Kruskal-Wallis:  $\chi^2=10.92$ ,  $df=4$ ,  $p=0.0275$ ). Time spent approaching and retreating  
492 were strongly correlated with each other (Pearson's  $r = 0.976$ ), but stationary, or 'freezing,'  
493 responses were only partially correlated with approach patterns (Pearson's  $r$ , approach =  
494 0.662; retreat = 0.648). Differences were also detected in swimming velocity during the test;  
495 approach velocity (ANOVA Adj.  $R^2= 0.227712$ ,  $F_{(4, 70)} = 6.1599$ ,  $p=0.0003$ ), retreat velocity  
496 (Wilcoxon/Kruskal-Wallis test,  $\chi^2=27.49$ ,  $p<0.0001$ ), and overall average velocity  
497 (Wilcoxon/Kruskal-Wallis test,  $\chi^2=22.54$ ,  $p=0.0002$ , Fig 2D, top panel) were all different by  
498 species. Additionally, the *Metriaclima* spp. were faster when retreating from the shell than  
499 when approaching it, whereas *Auloncara baenschi* approached and retreated with the same  
500 speed (Fig 2D, bottom panel).

501

502 3.4 Microhabitat is associated with species differences in exploratory behavior

503

504 *Open field test*

505

506 To investigate the relationship between microhabitat and behavior, open field behavior was  
507 analyzed in 19 species representing five Lake Malawi microhabitats (rock, sand, sandy  
508 intermediate, rocky intermediate, and shallow silt intermediate). Several behavioral metrics  
509 were analyzed including total distance traveled, total number of entries into the center region,  
510 total time spent in the center region, and total time spent in the corner regions. There was a  
511 significant relationship between microhabitat and total time spent in the center region ( $t=2.887$ ;  
512  $p=0.00415$ ), as well as total time spent in the corners ( $t=-3.056$ ;  $p=0.00243$ ); but not number  
513 of entries into the center region ( $t=-0.915$ ;  $p=0.3608$ ) or total distance traveled ( $t=0.773$ ;  
514  $p=0.44043$ ). The strongest behavioral differences were observed for time spent in the corner  
515 regions, where rock-dwelling species spent significantly more time compared to species  
516 inhabiting rocky intermediate ( $t=-2.070$ ;  $p=0.039292$ ), sandy ( $t=-3.056$ ;  $p=0.002430$ ), sandy  
517 intermediate ( $t=-3.106$ ;  $p=0.002064$ ); and shallow silt habitats ( $t=-3.326$ ;  $p=0.000985$ ).  
518 Additional differences between microhabitats are represented in Supplementary Figure 2, and  
519 the full results of the linear modeling for open field behavior, including estimates for time spent  
520 in each zone by microhabitat, are presented in Table 2.

521 There were also differences in pattern of movement over time associated with microhabitat  
522 when controlling for arena size and lab (repeated measures MANOVA, full model  $F_{(6,334)}=5.86$ ,  
523  $p<0.0001$ ). Microhabitat was associated with both frequency of freezing ( $F_{(4,334)}=4.94$ ,  
524  $p=0.0007$ ) and the pattern of freezing over time (Wilks' Lambda value 0.793, approx.  
525  $F_{(16,1011.9)}=4.99$ ,  $p<0.0001$ ). Both rocky and sandy interface species initially froze more  
526 frequently and exhibited a decrease in slowed swimming as the assay progressed, whereas  
527 open sand species initially froze less but increased freezing behavior as the assay progressed  
528 (Fig 2E). These patterns were also reflected by differences in swimming velocity over the  
529 course of the assay (Fig 2F, ANOVA significance groups by letter,  $p<0.05$ ).

530

531 *Novel tank test*

532

533       The strong differences in open field behavior—specifically in preference for corner  
534 regions—between rock-dwelling species and species inhabiting other microhabitats motivated  
535 us to test whether behavioral differences might persist in other types of novel environments,  
536 such as the novel tank test. Although behavior relative to corner regions is not a traditionally  
537 analyzed behavioral metric in the novel tank test, we reasoned that the most open area of the  
538 tank (center-top region) was the most distant from corner regions and, in contrast, that the  
539 outermost edges of the tank (from the side view video) were in immediate proximity to the  
540 corners. We therefore measured the average distance to the outer edge/corners of the tank  
541 for each subject. Consistent with findings from the open field test, rock-dwelling species  
542 exhibited a strong preference for the corners, remaining significantly closer to the corners  
543 compared to sand-dwelling species ( $t=2.082$ ;  $p=0.03984$ ), but not compared to shallow silt  
544 species ( $t=0.024$ ;  $p=0.98050$ ).

545

546

547

548

549

550

551

552

553

554

555

556

557

558

559

560

561

| Behavior ~ microhabitat + lineage + <i>genus</i> + species + test site + arena size |                               |                    |          |                |             |                            |
|-------------------------------------------------------------------------------------|-------------------------------|--------------------|----------|----------------|-------------|----------------------------|
| Dataset                                                                             | Behavior                      | Microhabitat       | Y        | Standard Error | t-statistic | p                          |
| Open field (19 species)                                                             | Time spent in corners         | (Intercept)        | 239.014  | 31.875         | 7.498       | 6.45x10 <sup>-13</sup> *** |
|                                                                                     |                               | Rocky intermediate | 176.111  | 30.394         | -2.070      | 0.039292 *                 |
|                                                                                     |                               | Sand               | 129.838  | 35.721         | -3.056      | 0.002430 **                |
|                                                                                     |                               | Sandy intermediate | 59.651   | 57.740         | -3.106      | 0.002064 **                |
|                                                                                     |                               | Silt               | 108.750  | 39.171         | -3.326      | 9.85x10 <sup>-4</sup> ***  |
|                                                                                     | Time spent in center          | (Intercept)        | -10.409  | 22.269         | -0.467      | 0.64053                    |
|                                                                                     |                               | Rocky intermediate | 6.393    | 21.234         | 0.791       | 0.42937                    |
|                                                                                     |                               | Sand               | 61.644   | 24.956         | 2.887       | 0.00415 **                 |
|                                                                                     |                               | Sandy intermediate | 86.634   | 40.339         | 2.406       | 0.01671 *                  |
|                                                                                     |                               | Silt               | 65.242   | 27.366         | -2.351      | 0.00603 *                  |
|                                                                                     | Total entries into center     | (Intercept)        | 5.4230   | 2.9792         | 1.820       | 0.06966                    |
|                                                                                     |                               | Rocky intermediate | 3.2069   | 2.8407         | -0.780      | 0.43591                    |
|                                                                                     |                               | Sand               | 2.4176   | 3.3387         | -0.915      | 0.36081                    |
|                                                                                     |                               | Sandy intermediate | 7.1277   | 5.3967         | 0.316       | 0.75229                    |
|                                                                                     |                               | Silt               | 10.5824  | 3.6611         | 1.409       | 0.15974                    |
|                                                                                     | Total distance traveled       | (Intercept)        | 1112.44  | 436.96         | 2.546       | 0.011370 *                 |
|                                                                                     |                               | Rocky intermediate | 1779.07  | 416.64         | 1.600       | 0.110587                   |
|                                                                                     |                               | Sand               | 1490.68  | 489.67         | 0.7772      | 0.440432                   |
|                                                                                     |                               | Sandy intermediate | 2423.06  | 791.52         | 1.656       | 0.098738                   |
|                                                                                     |                               | Silt               | 2090.37  | 536.97         | 1.821       | 0.069511                   |
| Novel tank (8 species)                                                              | Average distance from corners | (Intercept)        | 0.778672 | 0.266971       | 2.917       | 0.00435 **                 |
|                                                                                     |                               | Sand               | 1.406998 | 0.301781       | 2.082       | 0.03984 *                  |
|                                                                                     |                               | Silt               | 0.786065 | 0.301781       | 0.024       | 0.98050                    |

562

563 **Table 1. Effects of microhabitat on open field behavior and distance to the corners in**

564 **the novel tank test.** This table is a summary of linear regression output for models fitting

565 behavioral data to microhabitats, phylogenetic factors, and batch-like factors. The table

566 presents the slope coefficient estimate (Y), standard error, t-statistic, and p-value for the

567 intercept and different microhabitats (note that p-values for microhabitats represent

568 significance relative to rock-dwellers). The full model is presented at the top and was fit to open

569 field behavioral data. For novel tank diving data, italic terms were removed from the model as

570 each species represented a unique genus, and test site and tank dimensions were identical for

571 all subjects. Rock-dwelling species remained closer to corner regions compared to sand-

572 dwelling species in both the open field and novel tank tests. Asterisks indicate levels of

573 significance (\* for p<0.05; \*\* for p<0.005; \*\*\* for p<0.0005).

574

575 3.5 Intermediate microhabitats are associated with high exploratory phenotypes in the open  
576 field test

577

578 We next tested whether species inhabiting intermediate habitats express increased  
579 exploratory behavior compared to members of the canonical rock and sand Lake Malawi  
580 ecotypes. Indeed, a linear model controlling for variance explained by microhabitat, arena  
581 size, test site, and phylogenetic factors revealed that species inhabiting intermediate habitats  
582 spent significantly more time in the center region ( $t=2.764$ ,  $p=0.0060$ ) and significantly less  
583 time in the corner regions ( $t=-3.326$ ,  $p=0.0010$ ) compared to rock- and sand-dwelling species,  
584 but did not differ in the total number of entries into the center ( $t=1.409$ ,  $p=0.1597$ ) or total  
585 distance traveled ( $t=1.821$ ,  $p=0.0695$ ).

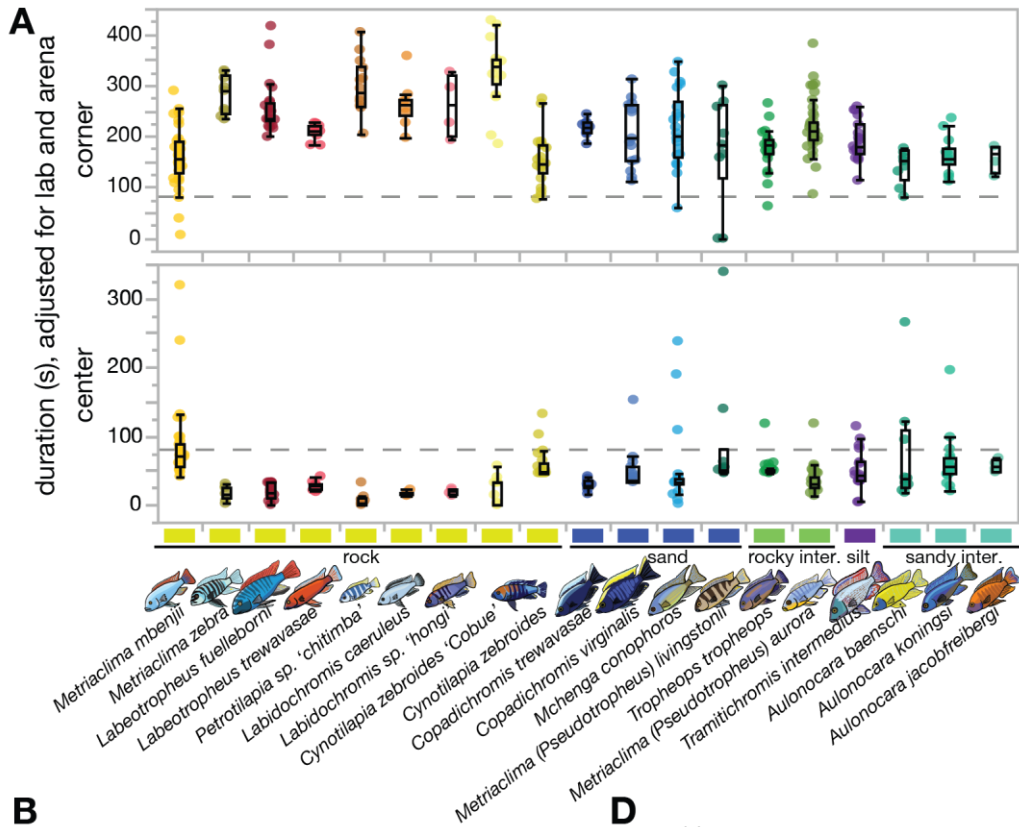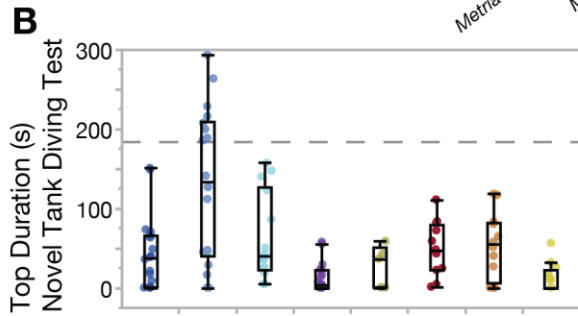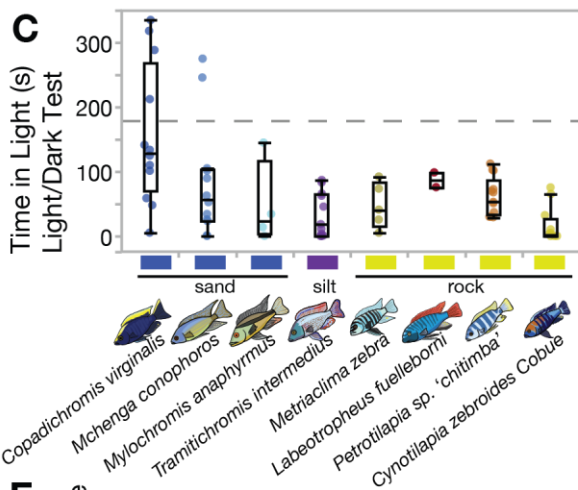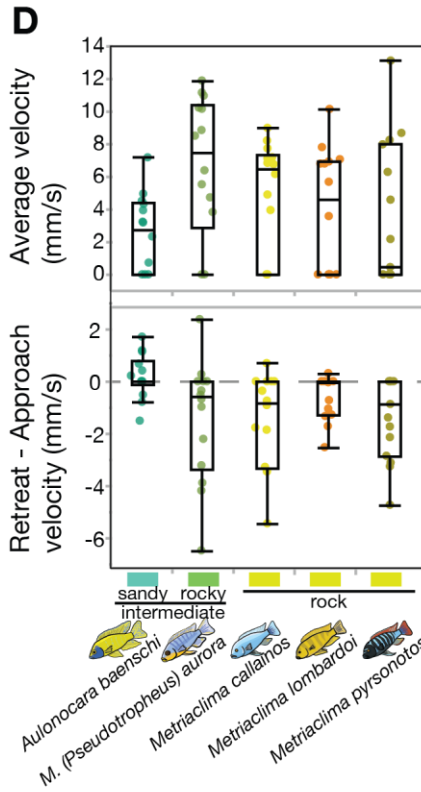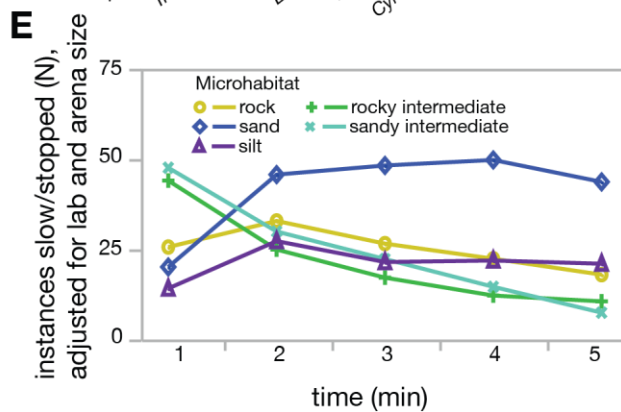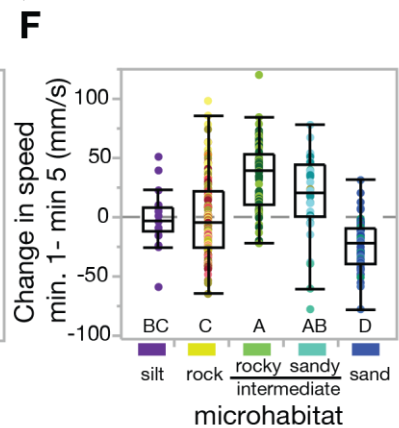

587 **Figure 2. Behavioral responses to novel stimuli across species and microhabitats.**

588 Behavioral responses to novel stimuli differed by species and microhabitat across all four  
589 assays. This Fig illustrates representative dimensions of behavior in each assay to highlight  
590 these differences: time spent in the center and corner regions in the open field test (A); time  
591 spent in the top half in the novel tank test (B); time spent in the light half in the light-dark test  
592 (C); average velocity and differences in approach and retreat velocities in the novel object test  
593 (D); instances of slow/stopped movement in the open field test over time (E); and change in  
594 swimming velocity over the course of the open field test (F). Species differences were  
595 observed for every behavioral measure. Microhabitat differences were observed for time spent  
596 in center and corners in the open field test (A); distance to the edge in the novel tank test (B);  
597 instances of slowed or stopped movement over time in the open field test (E); and change in  
598 velocity over time in the open field test (F). For Panels A-D, individual species tested are  
599 illustrated and labeled below. For all panels, microhabitat is color coded and labeled. Dotted  
600 lines in all panels indicate null expected values for time spent in each zone based on zone  
601 area.

602

603 3.6 Malawi cichlids exhibit modular patterns of behavioral covariation across contexts

604

605 We next investigated whether behavioral phenotypes covaried across different novel contexts  
606 in Malawi cichlids. To assess the relative evolutionary integration vs. modularity of exploratory  
607 behaviors, we correlated individual subjects' behaviors across multiple assays in two  
608 independent experiments and identified clusters of strongest covariation using MMC. For  
609 comparison, we applied the same analysis to a previously published zebrafish data set in  
610 which high and low exploratory strains exhibited syndromic patterns of behavior (Wong *et al*,  
611 2012). As expected, modularity analysis revealed extensive clustering between assays in  
612 zebrafish: five of the eight (62.5%) modules encompassed multiple behavioral assays,  
613 indicating that behavioral phenotypes in zebrafish correlated strongly across novel contexts.  
614 In stark contrast, for both Malawi cichlid data sets, behavioral modules grouped exclusively  
615 within assay rather than between assay—zero of ten (0%) modules from the NCSU data set  
616 and zero of three (0%) modules from the GT data spanned multiple assays.

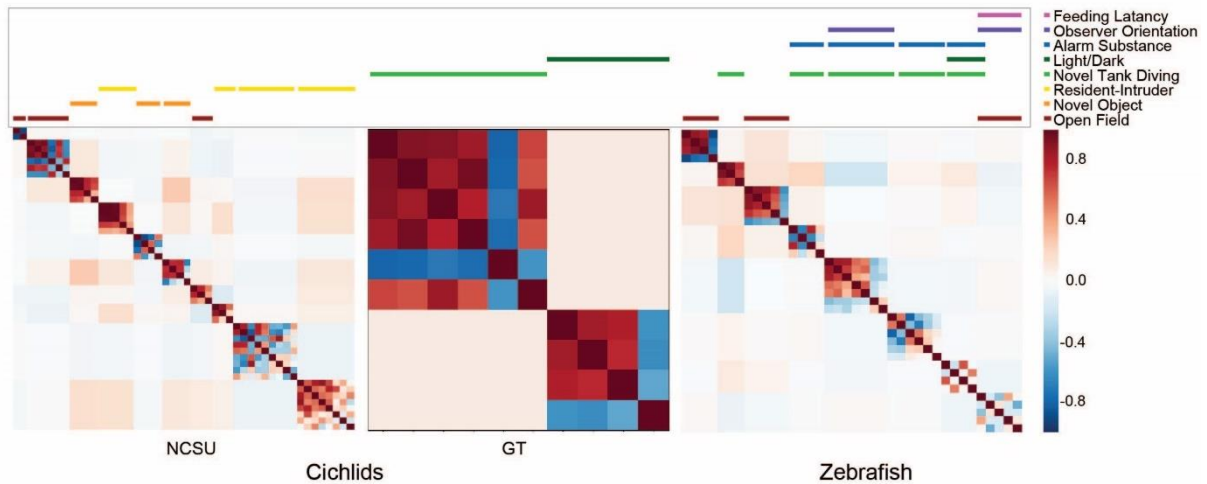

617

618 **Figure 3. Behavioral modularity analysis across novel environment assays in Lake**

619 **Malawi cichlids and high- and low-anxiety strains of zebrafish.** Clustering by assay in

620 cichlids (NCSU and GT), but across assays in zebrafish. Each entry into the matrix is a single

621 behavioral measurement (such as seconds in the corner [open field], or latency to enter the

622 top of the arena [novel tank]. The modules show the correlations between the measurements

623 across all individuals, with dark red indicating a strong positive correlation and dark blue

624 indicating a strong negative correlation. The lines at the top indicated which assays each

625 module represents.

626

#### 627 4 Discussion

628

629 Across all three novel environment behavioral assays (novel tank test, light-dark test, open

630 field test), Lake Malawi cichlids showed place biases that mirrored those of other teleosts,

631 spending less time in the top half in the novel tank test, the light half in the light-dark test, and

632 the center region in the open field test (Maximino et al., 2007; Stewart et al., 2010; Stewart et

633 al., 2012; Yoshida, Nagamine, & Uematsu, 2005). The patterns in the light-dark and open field

634 tests also reflect behavioral patterns observed in response to similar novel environments in

635 terrestrial vertebrates such as mice and rats: mice and rats spend less time in the light zone

636 in the light-dark test and the center region in the open field test (Bailey & Crawley, 2009;

637 Ramos, Berton, Mormède, & Chaouloff, 1997). Taken together, these results support

638 conserved behavioral and/or stress responses to specific types of novel stimuli that are shared

639 between Lake Malawi cichlids and other teleosts, and more broadly across vertebrates.



640

641 More specific dimensions of behavior differed strongly between species in all four assays (e.g.  
642 strength of place biases between zones, number of zone entries, latencies to enter arena  
643 zones, and total distance traveled among others). Because Lake Malawi cichlids are thought  
644 to have diverged <1 mya, these results suggest that behavioral responses to novel stimuli  
645 have rapidly evolved in this species group. This is consistent with previous work showing that  
646 behavioral responses to novel stimuli have rapidly diverged between closely-related species  
647 of birds and mammals (Cowan, 1977; R. S. Greenberg, 2003; C. Mettke-Hofmann, Winkler,  
648 Hamel, & Greenberg, 2013; Claudia Mettke-Hofmann et al., 2002). We further investigated  
649 this behavioral variation by comparing Lake Malawi cichlid behavioral variation in the novel  
650 tank test with behavioral variation in wild-derived strains of zebrafish that have been selectively  
651 bred for high and low exploratory behavior. We found that, compared to high and low  
652 exploratory zebrafish, Lake Malawi cichlids exhibited a higher degree of phenotypic variance  
653 in multiple dimensions of behavior, including the amount of time spent in the top and the  
654 number of entries into the top. These data further support the high degree of behavioral  
655 variation in Lake Malawi cichlids.

656

657 We next demonstrated a strong association between microhabitat and exploratory behavior in  
658 Lake Malawi cichlids. Rock-dwelling species spent significantly more time in the corner regions  
659 and less time in the center region compared to species inhabiting open sand, rocky  
660 intermediate, sandy intermediate, and shallow silt habitats. Rock-dwelling species also  
661 remained closer to the tank corners in the novel tank test compared to sand-dwelling species,  
662 suggesting that this preference persists when exploration is restricted in different spatial  
663 dimensions. One potential explanation for these data is that a behavioral preference for edges  
664 or corners, and/or an aversion toward open and exposed sandy environments, helps mediate  
665 behavioral preferences for the narrow crevasses and caves characteristic of rocky habitats;  
666 inversely, higher exploratory behavior may facilitate preference for or invasion of new and  
667 potentially more exposed ecological niches. In Lake Malawi cichlids, microhabitat has also  
668 been associated with species differences in neuroanatomy (e.g. volume of the cerebellum and  
669 telencephalon) and aggression (Danley, 2011; Huber, van Staaden, Kaufman, & Liem, 1997;

670 Sylvester et al., 2010). Taken together, these data suggest that microhabitat may play a  
671 central role in cichlid brain and behavioral evolution.

672

673 Exploratory behaviors may have different tradeoffs in more uniform versus variable  
674 environments (Greenberg & Mettke-hofmann, 2001). Consistent with this idea, a comparative  
675 study in parrots found that species inhabiting more “intermediate” habitats between the forest  
676 and savannah more readily approach novel objects compared to species inhabiting more  
677 uniform savannah habitats (Claudia Mettke-Hofmann et al., 2002). We tested whether  
678 intermediate habitats are associated with higher levels of exploratory behavior in Lake Malawi  
679 cichlids compared to the canonical rock-dwelling and sand-dwelling ecotypes. Across 19  
680 species, we found that species inhabiting intermediate habitats are more exploratory in the  
681 open field test compared to the rock-dwellers and sand-dwellers, spending more time in the  
682 center region and less time in the corner regions of the open field arena. The direction of the  
683 association between habitat and behavior is thus consistent between parrots and cichlids.  
684 Although habitat variability or complexity is difficult to measure, these data are consistent with  
685 the hypothesis that intermediate habitat zones are associated with increased exploratory  
686 behavior in both birds and teleosts. Interestingly, *Tramitichromis intermedius*, which inhabits  
687 intermediate shallow silt habitats near reed stands, readily explored the center region in the  
688 shallow open field test but exhibited a strong corner preference in the novel tank test,  
689 highlighting that exploratory behavior can vary strongly depending on the behavioral assay  
690 and the spatial features of the environment.

691

692 Evolutionary integration and modularity refer to patterns of covariation among sets of traits  
693 across taxa. For example, if the dimensions of different oral jaw bones are correlated in the  
694 same way across species, then they are considered to be evolutionarily integrated. In contrast,  
695 if they are uncorrelated or are correlated non-uniformly across taxa, they are considered to be  
696 more modular and may be more evolvable, although see Armbruster et al. (Armbruster et al.,  
697 2014). Comparative studies in Lake Malawi cichlids have demonstrated modular patterns of  
698 covariation for several complex traits that are thought to have played a central role in cichlid

699 diversification, including oral jaw morphology and color patterning (R. Craig Albertson et al.,  
700 2014; Parsons et al., 2011).

701

702 We investigated patterns of covariation in Lake Malawi cichlid behavior, in which our traits of  
703 interest were behavioral outputs in response to different sets of novel stimuli. Correlated  
704 behaviors across contexts, or behavioral syndromes, have been demonstrated in many  
705 species, including teleost fishes (Andrew Sih, Alison M Bell, J Chadwick Johnson, &  
706 Robert E Ziemba, 2004; Sih, Bell, & Johnson, 2004; Sih & Bell, 2008). We reasoned that if  
707 behavioral phenotypes in different novel contexts are strongly correlated, or syndromic, this  
708 would constitute evidence for phenotypic integration. In contrast, weakly or uncorrelated  
709 behavioral phenotypes across contexts would support modular patterns of behavioral  
710 variation. We found that exploratory behavior was weakly correlated across assays in Lake  
711 Malawi cichlids in two separate experiments, consistent with modular patterns of behavioral  
712 variation. As a reference, we applied the same analysis to a previously published dataset from  
713 high and low exploratory strains of zebrafish that exhibit syndromic behavior (Baker,  
714 Goodman, Santo, & Wong, 2018; Ryan Y Wong et al., 2012). As expected, and in contrast to  
715 Lake Malawi cichlids, this analysis revealed patterns of strong behavioral covariation across  
716 assays. Taken together, these results are consistent with the notion that, like other complex  
717 traits, Lake Malawi cichlids exhibit modular patterns of behavioral variation, and raise the  
718 possibility that exploratory behavior is highly evolvable in this species assemblage.

719

720 There are several limitations to these experiments. First, these assays do not reflect  
721 environmental conditions in Lake Malawi, and therefore it is unclear how behavioral  
722 phenotypes in these experiments map onto behavior in the wild. Additionally, although the  
723 number of species investigated was larger than most comparative behavioral investigations,  
724 larger samples of species and individuals may uncover additional links between more specific  
725 dimensions of ecology and behavioral variation. For example, factors such as diet, resource  
726 distribution, population density, turbidity, depth, and/or predation risk may explain species  
727 differences in behavioral responses to novel stimuli. Additional factors may also influence  
728 behavioral responses to novel stimuli across species, such as developmental stage, sex, or

729 social context. These questions were beyond the scope of this study and are promising areas  
730 for future research. Lastly, the sample sizes here were not sufficiently large to investigate  
731 syndromic behavior within individual Lake Malawi cichlid species; thus, interspecies  
732 differences in behavioral syndromes may be revealed by future comparative investigations  
733 with larger samples.

734

735 Despite these limitations, these experiments constitute a large comparative investigation of  
736 exploratory behavioral variation in a previously untested and species-rich vertebrate system.  
737 We show strong species differences in exploratory behavior, demonstrate links to  
738 microhabitat, and show that intermediate microhabitats predict higher levels of exploratory  
739 behavior. Our data also supports modular patterns of exploratory behavioral variation across  
740 Lake Malawi cichlids. Taken together, these findings demonstrate that Lake Malawi cichlids  
741 are positioned as a powerful complement to traditional model systems for investigating the  
742 ecological, neural, and genetic factors underlying behavioral evolution.

743

#### 744 **Acknowledgements**

745

746 This work was supported by an Arnold and Mabel Beckman Foundation Beckman Young  
747 Investigator Award to RBR and by NIH grant R01GM101095 to JTS.

748

749

750

751

752

753

754

755

756

757

758

759 **References**

- 760 Albertson, R. C., Markert, J. A., Danley, P. D., & Kocher, T. D. (1999). Phylogeny of a rapidly  
761 evolving clade: the cichlid fishes of Lake Malawi, East Africa. *Proc Natl Acad Sci U S*  
762 *A*, *96*(9), 5107-5110.
- 763 Albertson, R. C., Powder, K. E., Hu, Y., Coyle, K. P., Roberts, R. B., & Parsons, K. J. (2014).  
764 Genetic basis of continuous variation in the levels and modular inheritance of  
765 pigmentation in cichlid fishes. *Molecular Ecology*, *23*(21), 5135-5150.  
766 doi:doi:10.1111/mec.12900
- 767 Andrew Sih, Alison M Bell, J Chadwick Johnson, & Robert E Ziemba. (2004). Behavioral  
768 Syndromes: An Integrative Overview. *The Quarterly Review of Biology*, *79*(3), 241-  
769 277. doi:10.1086/422893
- 770 Armbruster, W. S., Pélabon, C., Bolstad, G. H., & Hansen, T. F. (2014). Integrated  
771 phenotypes: understanding trait covariation in plants and animals. *Philosophical*  
772 *transactions of the Royal Society of London. Series B, Biological sciences*,  
773 *369*(1649), 20130245-20130245. doi:10.1098/rstb.2013.0245
- 774 Bailey, K. R., & Crawley, J. N. (2009). Anxiety-related behaviors in mice.
- 775 Baker, M. R., Goodman, A. C., Santo, J. B., & Wong, R. Y. (2018). Repeatability and  
776 reliability of exploratory behavior in proactive and reactive zebrafish, *Danio rerio*.  
777 *Scientific reports*, *8*(1), 12114-12114. doi:10.1038/s41598-018-30630-3
- 778 Brawand, D., Wagner, C. E., Li, Y. I., Malinsky, M., Keller, I., Fan, S., . . . Di Palma, F.  
779 (2014). The genomic substrate for adaptive radiation in African cichlid fish. *Nature*,  
780 *513*(7518), 375-381. doi:10.1038/nature13726
- 781 Cowan, P. E. (1977). Neophobia and neophilia: New-object and new-place reactions of three  
782 *Rattus* species. *Journal of Comparative and Physiological Psychology*, *91*(1), 63-71.  
783 doi:10.1037/h0077297
- 784 Danley, P. D. (2011). Aggression in closely related Malawi cichlids varies inversely with  
785 habitat complexity. *Environmental Biology of Fishes*, *92*(3), 275. doi:10.1007/s10641-  
786 011-9838-7

- 787 Dingemanse, N. J., Both, C., Drent, P. J., & Tinbergen, J. M. (2004). Fitness consequences  
788 of avian personalities in a fluctuating environment. *Proc Biol Sci*, 271(1541), 847-852.  
789 doi:10.1098/rspb.2004.2680
- 790 Dingemanse, N. J., Wright, J., Kazem, A. J. N., Thomas, D. K., Hickling, R., & Dawnay, N.  
791 (2007). Behavioural syndromes differ predictably between 12 populations of three-  
792 spined stickleback. *Journal of Animal Ecology*, 76(6), 1128-1138.  
793 doi:doi:10.1111/j.1365-2656.2007.01284.x
- 794 Ferrari, M. C., McCormick, M. I., Meekan, M. G., & Chivers, D. P. (2015). Background level  
795 of risk and the survival of predator-naive prey: can neophobia compensate for  
796 predator naivety in juvenile coral reef fishes? *Proc Biol Sci*, 282(1799), 20142197.
- 797 Garland, T., & Adolph, S. C. (1994). Why Not to Do Two-Species Comparative Studies:  
798 Limitations on Inferring Adaptation. *Physiological Zoology*, 67(4), 797-828.
- 799 Greenberg, R. (2003). The role of neophobia and neophilia in the development of innovative  
800 behaviour of birds. In S. M. Reader & K. N. Laland (Eds.), *Animal Innovation* (pp.  
801 175--196): Oxford University Press.
- 802 Greenberg, R., & Mettke-hofmann, C. (2001). Ecological Aspects of Neophobia and  
803 Neophilia in Birds. In V. Nolan & C. F. Thompson (Eds.), *Current Ornithology* (pp.  
804 119-178). Boston, MA: Springer US.
- 805 Greenberg, R. S. (2003). The role of neophobia and neophilia in the development of  
806 innovative behaviour of birds.
- 807 Huber, R., van Staaden, M. J., Kaufman, L. S., & Liem, K. F. (1997). Microhabitat use,  
808 trophic patterns, and the evolution of brain structure in African cichlids. *Brain Behav*  
809 *Evol*, 50(3), 167-182. doi:10.1159/000113330
- 810 Johnson, Z. V., & Young, L. J. (2018). Evolutionary diversity as a catalyst for biological  
811 discovery. *Integr Zool*. doi:10.1111/1749-4877.12339
- 812 Kocher, T. D. (2004). Adaptive evolution and explosive speciation: the cichlid fish model. *Nat*  
813 *Rev Genet*, 5(4), 288-298. doi:10.1038/nrg1316
- 814 Lapiedra, O., Schoener, T. W., Leal, M., Losos, J. B., & Kolbe, J. J. (2018). Predator-driven  
815 natural selection on risk-taking behavior in anole lizards. *Science*, 360(6392), 1017-  
816 1020. doi:10.1126/science.aap9289

- 817 Maximino, C., de Brito, T. M., de Moraes, F. D., de Oliveira, F. V. C., Taccolini, I. B., Pereira,  
818 P. M., . . . Gouveia Jr, A. (2007). A comparative analysis of the preference for dark  
819 environments in five teleosts. *International Journal of Comparative Psychology*,  
820 20(4), 351-367.
- 821 Mettke-Hofmann, C., Winkler, H., Hamel, P. B., & Greenberg, R. (2013). Migratory New  
822 World blackbirds (icterids) are more neophobic than closely related resident icterids.  
823 *PLoS One*, 8(2), e57565. doi:10.1371/journal.pone.0057565
- 824 Mettke-Hofmann, C., Winkler, H., & Leisler, B. (2002). The Significance of Ecological Factors  
825 for Exploration and Neophobia in Parrots. *Ethology*, 108(3), 249-272.  
826 doi:doi:10.1046/j.1439-0310.2002.00773.x
- 827 Parsons, K. J., Cooper, W. J., & Albertson, R. C. (2011). Modularity of the oral jaws is linked  
828 to repeated changes in the craniofacial shape of african cichlids. *International journal*  
829 *of evolutionary biology*, 2011, 641501-641501. doi:10.4061/2011/641501
- 830 Raff, E. C., & Raff, R. A. (2000). Dissociability, modularity, evolvability. *Evolution &*  
831 *development*, 2(5), 235-237.
- 832 Ramos, A., Berton, O., Mormède, P., & Chaouloff, F. (1997). A multiple-test study of anxiety-  
833 related behaviours in six inbred rat strains. *Behavioural Brain Research*, 85(1), 57-  
834 69. doi:[https://doi.org/10.1016/S0166-4328\(96\)00164-7](https://doi.org/10.1016/S0166-4328(96)00164-7)
- 835 Réale, D., Reader, S. M., Sol, D., McDougall, P. T., & Dingemans, N. J. (2007). Integrating  
836 animal temperament within ecology and evolution. *Biological Reviews*, 82(2), 291-  
837 318. doi:doi:10.1111/j.1469-185X.2007.00010.x
- 838 Rupp, M. F., & Hulsey, C. D. (2014). Influence of substrate orientation on feeding kinematics  
839 and performance of algae-grazing Lake Malawi cichlid fishes. *J Exp Biol*, 217(Pt 17),  
840 3057-3066. doi:10.1242/jeb.105080
- 841 Sih, A., Bell, A., & Johnson, J. C. (2004). Behavioral syndromes: an ecological and  
842 evolutionary overview. *Trends in Ecology & Evolution*, 19(7), 372-378.  
843 doi:<https://doi.org/10.1016/j.tree.2004.04.009>
- 844 Sih, A., & Bell, A. M. (2008). Insights for behavioral ecology from behavioral syndromes.  
845 *Advances in the Study of Behavior*, 38, 227-281.

- 846 Smith, B. R., & Blumstein, D. T. (2008). Fitness consequences of personality: a meta-  
847 analysis. *Behavioral Ecology*, *19*(2), 448-455. doi:10.1093/beheco/arm144
- 848 Stewart, A., Cachat, J., Wong, K., Gaikwad, S., Gilder, T., DiLeo, J., . . . Kalueff, A. V.  
849 (2010). Homebase behavior of zebrafish in novelty-based paradigms. *Behavioural*  
850 *Processes*, *85*(2), 198-203. doi:<https://doi.org/10.1016/j.beproc.2010.07.009>
- 851 Stewart, A., Cachat, J. M., Wong, K., Wu, N., Grossman, L., Suci, C., . . . Kalueff, A. V.  
852 (2011). Phenotyping of Zebrafish Homebase Behaviors in Novelty-Based Tests. In A.  
853 V. Kalueff & J. M. Cachat (Eds.), *Zebrafish Neurobehavioral Protocols* (pp. 143-155).  
854 Totowa, NJ: Humana Press.
- 855 Stewart, A., Gaikwad, S., Kyzar, E., Green, J., Roth, A., & Kalueff, A. V. (2012). Modeling  
856 anxiety using adult zebrafish: A conceptual review. *Neuropharmacology*, *62*(1), 135-  
857 143. doi:10.1016/j.neuropharm.2011.07.037
- 858 Stone, E. A., & Ayroles, J. F. (2009). Modulated modularity clustering as an exploratory tool  
859 for functional genomic inference. *PLoS Genet*, *5*(5), e1000479.  
860 doi:10.1371/journal.pgen.1000479
- 861 Streelman, J. T., & Danley, P. D. (2003). The stages of vertebrate evolutionary radiation.  
862 *Trends in Ecology & Evolution*, *18*(3), 126-131.
- 863 Sylvester, J. B., Rich, C. A., Loh, Y. H., van Staaden, M. J., Fraser, G. J., & Streelman, J. T.  
864 (2010). Brain diversity evolves via differences in patterning. *Proc Natl Acad Sci U S*  
865 *A*, *107*(21), 9718-9723. doi:10.1073/pnas.1000395107
- 866 Wagner, G. P., Pavlicev, M., & Cheverud, J. M. (2007). The road to modularity. *Nature*  
867 *Reviews Genetics*, *8*(12), 921.
- 868 Wong, R. Y., Perrin, F., Oxendine, S. E., Kezios, Z. D., Sawyer, S., Zhou, L., . . . Godwin, J.  
869 (2012). Comparing behavioral responses across multiple assays of stress and  
870 anxiety in zebrafish (*Danio rerio*). *Behaviour*, *149*(10-12), 1205-1240.  
871 doi:[doi:https://doi.org/10.1163/1568539X-00003018](https://doi.org/10.1163/1568539X-00003018)
- 872 Wong, R. Y., Perrin, F., Oxendine, S. E., Kezios, Z. D., Sawyer, S., Zhou, L., . . . Godwin, J.  
873 (2012). Comparing behavioral responses across multiple assays of stress and  
874 anxiety in zebrafish (*Danio rerio*). *Behaviour*, *149*(10-12), 1205-1240.



- 875 York, R. A., & Fernald, R. D. (2017). The Repeated Evolution of Behavior. *Frontiers in*  
876 *Ecology and Evolution*, 4(143). doi:10.3389/fevo.2016.00143
- 877 York, R. A., Patil, C., Abdilleh, K., Johnson, Z. V., Conte, M. A., Genner, M. J., . . .  
878 Streelman, J. T. (2018). Behavior-dependent cis regulation reveals genes and  
879 pathways associated with bower building in cichlid fishes. *Proc Natl Acad Sci U S A*,  
880 115(47), E11081-E11090. doi:10.1073/pnas.1810140115
- 881 York, R. A., Patil, C., Hulsey, C. D., Anoruo, O., Streelman, J. T., & Fernald, R. D. (2015).  
882 Evolution of bower building in Lake Malawi cichlid fish: phylogeny, morphology, and  
883 behavior. *Frontiers in Ecology and Evolution*, 3(18). doi:10.3389/fevo.2015.00018
- 884 Yoshida, M., Nagamine, M., & Uematsu, K. (2005). Comparison of behavioral responses to a  
885 novel environment between three teleosts, bluegill *Lepomis macrochirus*, crucian  
886 carp *Carassius langsdorfii*, and goldfish *Carassius auratus*. *Fisheries Science*, 71(2),  
887 314-319. doi:10.1111/j.1444-2906.2005.00966.x
- 888
- 889
- 890
- 891
- 892
- 893
- 894
- 895
- 896
- 897
- 898
- 899
- 900
- 901
- 902
- 903

| Species                            | n  | Microhabitat | Mean time spent in bottom (seconds) | Mean time spent in top (seconds) | Standard Error | P <sub>top vs. bottom</sub> |
|------------------------------------|----|--------------|-------------------------------------|----------------------------------|----------------|-----------------------------|
| <i>Copadichromis virginalis</i>    | 18 | Sand         | 316.60                              | 43.40                            | 11.29          | 5.75x10 <sup>-10</sup> ***  |
| <i>Mchenga conophoros</i>          | 18 | Sand         | 229.88                              | 130.12                           | 23.35          | 0.0421 *                    |
| <i>Mylochromis anaphyrmus</i>      | 14 | Sand         | 295.95                              | 64.05                            | 15.30          | 2.70x10 <sup>-6</sup> ***   |
| <i>Tramitichromis intermedius</i>  | 18 | Silt         | 346.99                              | 13.01                            | 4.46           | 5.47x10 <sup>-18</sup> ***  |
| <i>Metriaclima zebra</i>           | 5  | Rock         | 332.46                              | 27.54                            | 13.15          | 2.05x10 <sup>-4</sup> ***   |
| <i>Labeothenopheus fuelleborni</i> | 12 | Rock         | 310.40                              | 49.60                            | 10.11          | 3.50x10 <sup>-8</sup> ***   |
| <i>Petrotilapia sp. 'chitimba'</i> | 12 | Rock         | 306.82                              | 53.18                            | 12.66          | 4.71x10 <sup>-7</sup> ***   |
| <i>Cynotilapia zebroides cobue</i> | 13 | Rock         | 348.23                              | 11.77                            | 4.99           | 1.32x10 <sup>-12</sup> ***  |

904

905 **Supplementary Table 1.** Place bias between bottom and top regions of the novel tank test  
 906 by species. Each row corresponds to the species labeled in the left column. The following are  
 907 presented for each species: sample size, microhabitat designation, mean time in bottom zone,  
 908 mean time in top zone, standard error for time spent in both zones, and two-tailed paired t-  
 909 test p-values for the difference in time spent between the two zones.

910

911

912

913

914

915

916

917

918

919

920

921

922

923

924

| Species                            | n  | Microhabitat | Mean time spent in dark (seconds) | Mean time spent in light (seconds) | Standard Error | P <sub>light vs. dark</sub> |
|------------------------------------|----|--------------|-----------------------------------|------------------------------------|----------------|-----------------------------|
| <i>Copadichromis virginalis</i>    | 12 | Sand         | 203.77                            | 156.23                             | 32.73          | 0.46                        |
| <i>Mchenga conophoros</i>          | 12 | Sand         | 275.42                            | 84.58                              | 27.02          | 0.0036 **                   |
| <i>Mylochromis anaphyrmus</i>      | 4  | Sand         | 311.83                            | 48.17                              | 38.02          | 0.028 *                     |
| <i>Tramitichromis intermedius</i>  | 11 | Silt         | 325.74                            | 34.26                              | 11.07          | 7.74x10 <sup>-8</sup> ***   |
| <i>Metriaclima zebra</i>           | 5  | Rock         | 312.67                            | 47.33                              | 17.67          | 0.0011 **                   |
| <i>Labeothropheus fueleborni</i>   | 2  | Rock         | 272.91                            | 87.09                              | 16.19          | 0.078                       |
| <i>Petrotilapia sp. 'chitimba'</i> | 13 | Rock         | 297.82                            | 62.18                              | 8.34           | 4.87x10 <sup>-9</sup> ***   |
| <i>Cynotilapia zebroides Cobue</i> | 12 | Rock         | 344.07                            | 15.93                              | 8.15           | 3.12x10 <sup>-10</sup> ***  |

925

926 **Supplementary Table 2.** Place bias between light and dark halves of the light-dark test by  
 927 species. Each row corresponds to the species labeled in the left column. The following are  
 928 presented for each species: sample size, microhabitat designation, mean time in dark zone,  
 929 mean time in light zone, standard error for time spent in both zones, and two-tailed paired p-  
 930 value for the difference in time spent between the two zones.

931

932

933

934

935

936

937

938

939

940

941

942

943

944

| Species                                          | n  | Microhabitat       | Mean time center (seconds) | Mean time in periphery (seconds) | Standard Error | P <sub>center vs. periphery</sub> |
|--------------------------------------------------|----|--------------------|----------------------------|----------------------------------|----------------|-----------------------------------|
| <i>Aulonocara baenschi</i>                       | 9  | Sandy intermediate | 73.77                      | 246.23                           | 28.32          | 0.0121 *                          |
| <i>Aulonocara koningsi</i>                       | 18 | Sandy intermediate | 47.91                      | 272.09                           | 10.50          | 3.87x10 <sup>-9</sup> ***         |
| <i>Aulonocara jacobfreibergi</i>                 | 4  | Sandy intermediate | 36.52                      | 283.48                           | 13.98          | 0.00201 **                        |
| <i>Copadichromis trewasasae</i>                  | 11 | Sand               | 29.75                      | 290.25                           | 2.23           | 3.24x10 <sup>-14</sup> ***        |
| <i>Copadichromis virginalis</i>                  | 15 | Sand               | 16.99                      | 303.01                           | 8.23           | 4.52x10 <sup>-11</sup> ***        |
| <i>Mchenga conophoros</i>                        | 22 | Sand               | 30.84                      | 289.16                           | 14.11          | 5.99x10 <sup>-9</sup> ***         |
| <i>Tramitichromis intermedius</i>                | 19 | Silt               | 35.07                      | 284.93                           | 8.03           | 4.39x10 <sup>-12</sup> ***        |
| <i>Tropheops tropheops</i>                       | 29 | Rocky intermediate | 20.29                      | 299.71                           | 2.48           | 1.37x10 <sup>-30</sup> ***        |
| <i>Metriaclima (Pseudotropheus) livingstonii</i> | 10 | Rocky intermediate | 56.48                      | 263.52                           | 30.74          | 0.00622 ***                       |
| <i>Metriaclima (Pseudotropheus) aurora</i>       | 55 | Rocky intermediate | 29.94                      | 290.06                           | 2.20           | 5.78x10 <sup>-51</sup> ***        |
| <i>Metriaclima mbenjii</i>                       | 38 | Rock               | 62.06                      | 257.94                           | 10.13          | 7.89x10 <sup>-12</sup> ***        |
| <i>Metriaclima zebra</i>                         | 9  | Rock               | 17.32                      | 302.68                           | 3.31           | 5.83x10 <sup>-11</sup> ***        |
| <i>Labeotropheus fuelleborni</i>                 | 23 | Rock               | 9.27                       | 310.73                           | 2.13           | 1.10x10 <sup>-27</sup> ***        |
| <i>Labeotropheus trewasasae</i>                  | 11 | Rock               | 28.09                      | 291.91                           | 2.01           | 1.04x10 <sup>-14</sup> ***        |
| <i>Petrotilapia sp. 'chitimba'</i>               | 14 | Rock               | 2.56                       | 317.44                           | 1.09           | 1.91x10 <sup>-22</sup> ***        |
| <i>Labidochromis caeruleus</i>                   | 10 | Rock               | 17.17                      | 302.83                           | 0.80           | 1.75x10 <sup>-17</sup> ***        |
| <i>Labidochromis sp. 'hongii'</i>                | 4  | Rock               | 19.37                      | 300.63                           | 2.50           | 8.08x10 <sup>-6</sup> ***         |
| <i>Cynotilapia zebroides</i>                     | 21 | Rock               | 26.22                      | 293.78                           | 4.94           | 1.92x10 <sup>-17</sup> ***        |
| <i>Cynotilapia zebroides Cobue</i>               | 18 | Rock               | 4.90                       | 315.10                           | 3.30           | 1.20x10 <sup>-19</sup> ***        |

945

946 **Supplementary Table 3.** Place bias between central and peripheral regions of the open field  
947 test by species. Each row corresponds to the species labeled in the left column. The following  
948 are presented for each species: sample size, microhabitat designation, mean time in central  
949 regions, mean time in peripheral regions, standard error for time spent in both regions, and  
950 two-tailed paired p-value for the difference in time spent in central versus peripheral regions.

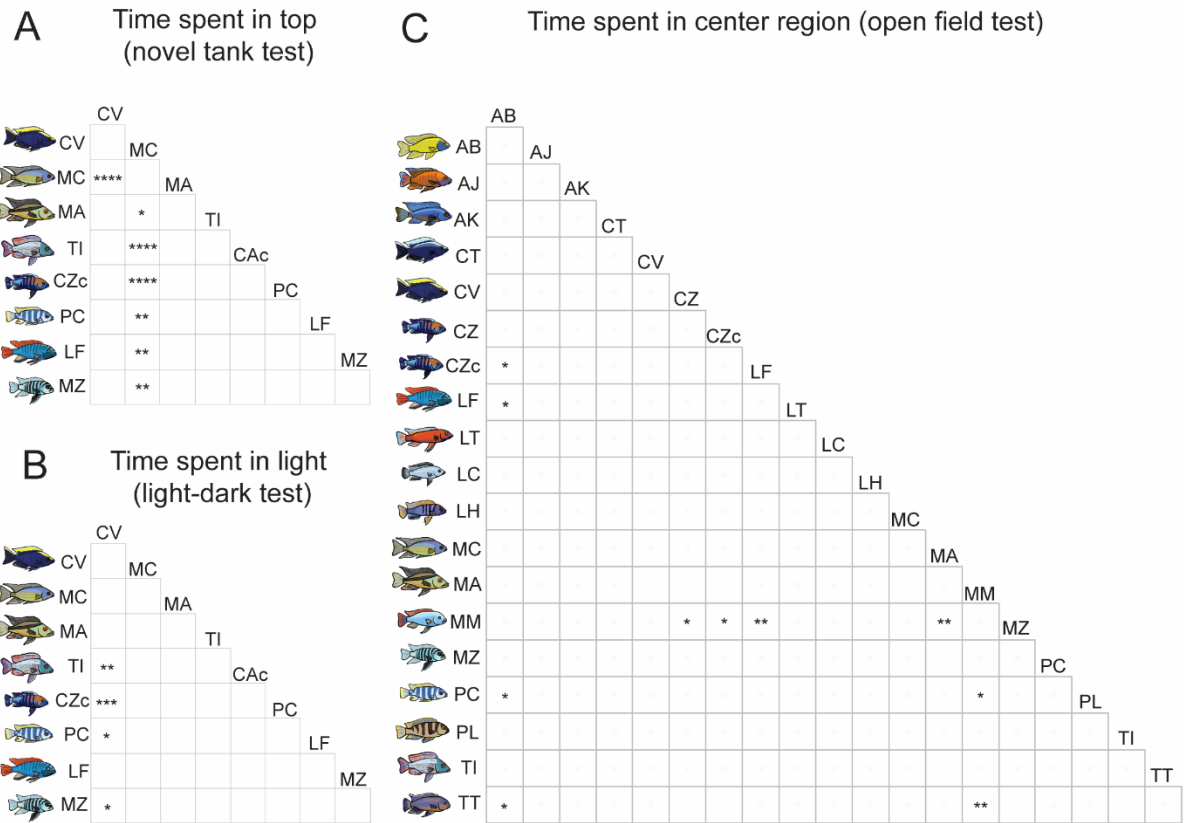

951

952

953

954

955

956

957

958

959

960

961

962

963

**Supplementary Figure 1.** Pairwise species differences in strength of zone preferences across assays. Species differences were present in the amount of time spent in the top half of the novel tank test (A), light half in the light-dark test (B), and center region in the open field test (C). Asterisks indicate levels of significance for post-hoc Tukey's HSD tests of the difference between species (\*  $p < 0.05$ , \*\*  $p < 0.005$ , \*\*\*  $p < 0.0005$ , \*\*\*\*  $p < 5 \times 10^{-5}$ ). Species abbreviations are as follows: AB (*Aulonocara baenschii*), AJ (*Aulonocara jacobfreibergi*), AK (*Aulonocara koningsi*), CT (*Copadichromis trewavasae*), CV (*Copadichromis virginalis*), CZ (*Cynotilapia zebroides*), CZc (*Cynotilapia zebroides* sp. 'afra cobue'), LF (*Labeotropheus fuelleborni*), LT (*Labeotropheus trewavasae*), LC (*Labidochromis caeruleus*), LH (*Labidochromis* sp. 'hong'), MC (*Mchenga conophoros*), MA (*Mylochromis anaphyrmus*), MM (*Metriaclima mbenjii*), MZ (*Metriaclima zebra*), PC (*Petrotilapia* sp. 'chitimba'), PL (*Pseudotropheus livingstonii*), TI (*Tramitichromis intermedius*), TT (*Tropheops tropheops*).

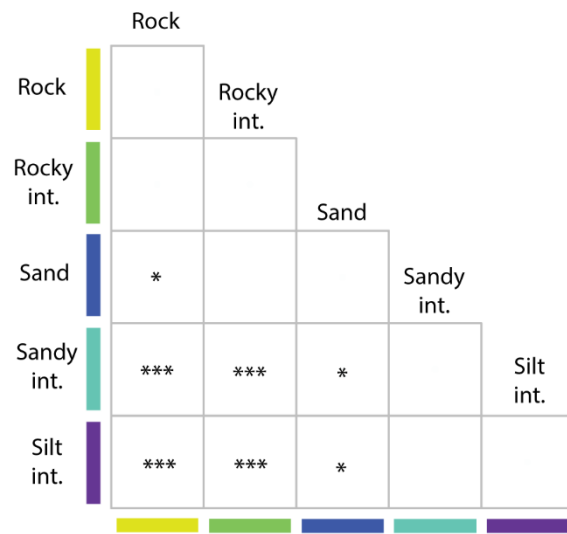

964

965 **Supplementary Figure 2.** Differences in open field behavior by microhabitat. Time spent in  
966 corner regions in the open field test differed significantly by microhabitat. The significance of  
967 each pairwise combination of different microhabitats (coded by color) is illustrated, with  
968 asterisks indicating the level of significance determined by post-hoc Tukey's HSD tests (\*  
969  $p < 0.05$ , \*\*  $p < 0.005$ , \*\*\*  $p < 0.0005$ , \*\*\*\*  $p < 5 \times 10^{-5}$ ).
